# Supplementary material for: Differential Effect of Free-Air CO2 Enrichment (FACE) in Different Organs and Growth Stages of Two Cultivars of Durum Wheat
Source: MDPI journal article supplement (doi:10.3390/plants12030686), 2023-02-03
Supplement: s1 [file s1]

Supplementary:

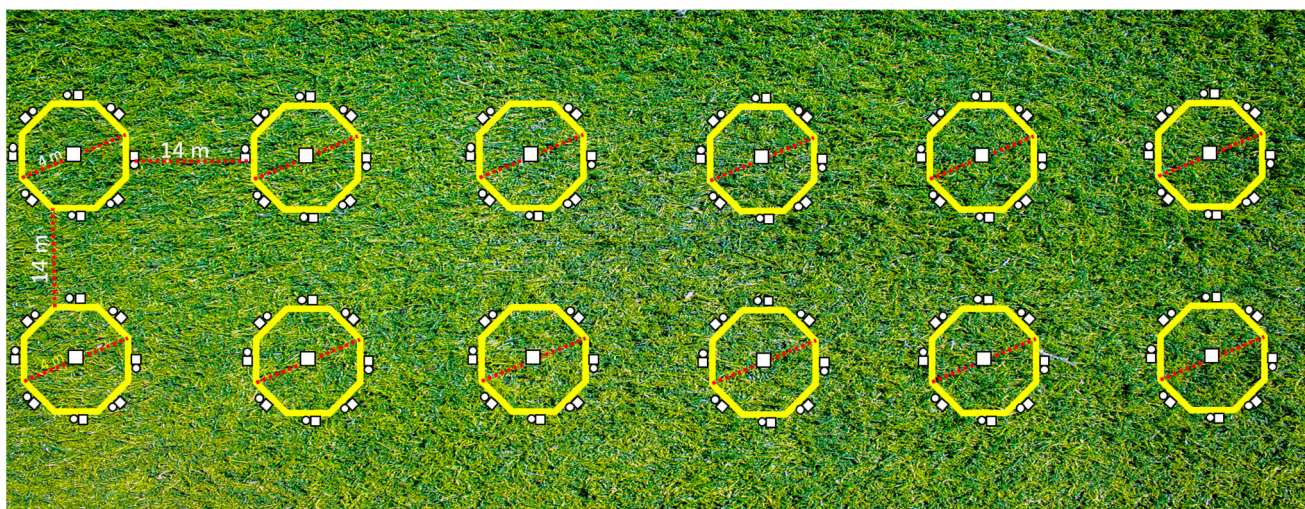

**Figure S1.** Design of mini-FACE experimental showing distribution of rings into field. Source: Own elaboration.
